# Supplementary material for: Structural trends in copper(ii) bis(thiosemicarbazone) radiopharmaceuticals
Source: Royal Society of Chemistry journal article supplement (doi:10.1039/b307499d), 2003-01-01
Supplement: b307499d2.doc [file b307499d2.doc]

**Fig. B.** Paired N-H---N and N-H---S hydrogen bonding networks in complexes without terminal alkyl groups. In **1**, molecules are linked into pairs by paired N-H---N hydrogen bonds, and the pairs are linked into ribbons by paired N-H---S hydrogen bonds. In **4**, molecules are linked into ribbons by paired N-H---N hydrogen bonds and the ribbons are cross-linked by paired N-H---S hydrogen bonds.

**Fig. C.** Networks of Cu---S and N-H---S hydrogen bonds in complexes with monoalkylated terminal nitrogen atoms. In **3** staircase-like chains are formed by alternating paired Cu---S bonds and paired N-H---S hydrogen bonds. In **6c** simple flat ribbons are formed by zig-zag chains of paired N-H---S hydrogen bonds.

**Fig. D.** Planar array of non-hydrogen bonded molecules in the crystal of **8**, which has dialkylated. Terminal nitrogen atoms.
